# Supplementary material for: DNA methylation restrains transposons from adopting a chromatin signature permissive for meiotic recombination
Source: PubMed Central journal article supplement — Genes Dev. 2015 Jun 15;29(12):1256–70. doi: 10.1101/gad.257840.114 (PMC4495397; doi:10.1101/gad.257840.114), 2015-06-15
Supplement: supp_29.12.1256_SuppTables.pdf [file supp_29.12.1256_SuppTables.pdf]

**Table S1. Antibody list**

| <b>ANTIBODY</b> | <b>SUPPLIER</b>     | <b>REFERENCE</b> |
|-----------------|---------------------|------------------|
| H3K9me2         | Abcam               | ab1220           |
| H3K9me3         | Abcam               | ab8898           |
| SYCP3           | Abcam               | ab12452          |
| TRA98           | Abcam               | ab82527          |
| H3 trimethyl K4 | Millipore           | 07-473           |
| RAD51           | Origene             | TA322085         |
| DMC1            | Santa Cruz          | sc-8973          |
| EpCAM           | Santa Cruz          | sc-53532         |
| Phospho-H2AX    | Upstate             | 05-536           |
| ORF1            | Gift from S. Martin |                  |
| SPO11           | Gift from S. Keeney |                  |

**Table S2: Primer and oligonucleotide list**

| TARGET           | SEQUENCE (5'-3')                                                  | APPLICATION                      |
|------------------|-------------------------------------------------------------------|----------------------------------|
| <i>βactin</i>    | F : AAG TGA CGT TGA CAT CCG<br>R : GAT CCA CAT CTG CTG GAA GG     | RT-qPCR                          |
| <i>Rrm2</i>      | F : CCGAGCTGGAAAGTAAAGCG<br>R : ATGGGAAAGACAACGAAGCG              | RT-qPCR                          |
| rDNA             | F : CCTGTGAATTCTCTGAACTC<br>R : CCTAAACTGCTGACAGGGTG              | TE copy number                   |
| L1 ORF2          | F : GGAGGGACACTTCATTCTCATCA<br>R : GCTGCTCTTGTATTTGGAGCATAGA      | RT-qPCR/TE copy number/ChIP-qPCR |
| L1 3' UTR        | F : ATGGACCATGTAGAGACTGCCA<br>R : CAATGGTGTGACGCGTTTGGGA          | TE copy number/ChIP-qPCR         |
| L1 Tf            | F : CAGCGGTGCGCCATCTTG<br>R : CACCCTCTCACCTGTTTCAGACTAA           | RT-qPCR/ChIP-qPCR                |
| L1 A             | F : GGATTCCACACGTGATCCTAA<br>R : TCCTCTATGAGCAGACCTGGA            | RT-qPCR/ChIP-qPCR                |
| L1 Gf            | F : CTCCTTGGCTCCGGGACT<br>R : CAGGAAGGTGGCCGGTTGT                 | RT-qPCR/ChIP-qPCR                |
| IAP 5' UTR       | F : CGGGTCGCGGTAATAAAGGT<br>R : ACTCTCGTTCCCAGCTGAA               | TE copy number/ChIP-qPCR         |
| IAPΔ1            | F : AACGCTGCTGCTTTAACTCC<br>R : TGCACATAAAGCTGGCACA               | RT-qPCR/ChIP-qPCR                |
| IAP LTR          | F : CTCCATGTGCTCTGCCTTCC<br>R : CCCCGTCCCTTTTTAGGAGA              | TE copy number/ChIP-qPCR         |
| IAP 3' LTR       | F : GCACATGCGCAGATTATTTGTT<br>R : CCACATTCGCCGTTACAAGAT           | ChIP-qPCR                        |
| MuERV-L          | F : CAATGGGAAGGTCCAGAAGA<br>R : CCTTGTTACCTCGGAATCCA              | RT-qPCR                          |
| <i>Vasa</i>      | F : CTAGGAAGACCAAATAGTGAATCTGAC<br>R : TCCAGAACCTGTACTACTTCTTCATT | RT-qPCR                          |
| <i>Sycp3</i>     | F : ATGCTTCGAGGGTGTGGG<br>R : TTCCACCAGGCACCATCTTT                | RT-qPCR                          |
| <i>Mili</i>      | F : ATGGGTCTTGACACAGCATTCC<br>R : AAGGATCAGGCAAAGAGGAAC           | RT-qPCR                          |
| <i>Maelstrom</i> | F : ACCAGCAAAAATTCCTCAAGGA<br>R : TGACCTCGTGTGCTAGAATAG           | RT-qPCR                          |
| <i>Miwi</i>      | F : TGGAGTGGCTGCAATGAATA<br>R : TTGACACGCTTCTTACCAC               | RT-qPCR                          |
| <i>Tdrd1</i>     | F : ACGAGGAGATGATCCCGATAGA<br>R : ACTTTATGGCAGAAGGAGGAAACA        | RT-qPCR                          |
| <i>Tdrd9</i>     | F : GAAGTTGCTTGACATGGGTGAA<br>R : GCACCAACCTCCTTTAACAGAAG         | RT-qPCR                          |
| <i>Tdrd5</i>     | F : CGTGTGGTATGCTGACCTGAA<br>R : AGCTTCTGTTTTCTTGTCTGGTTGA        | RT-qPCR                          |
| L1-A antisense   | GGTCCCATTGTGCGATTCTCGATCTTA                                       | Small RNA northern               |

|                        |                                                               |                    |
|------------------------|---------------------------------------------------------------|--------------------|
| U6                     | GCAGGGGCCATGCTAATCTTCTGTATTG                                  | Small RNA northern |
| <i>Bactin</i> promoter | F : CACCCATCGCCAAAACCTTCATCCT<br>R : CGCACAGTGCAGCATTTTTTTACC | ChIP-qPCR          |
| <i>H19</i> ICR         | F : ACATTCACACGAGCATCCAGG<br>R : GCTCTTTAGGTTTGGCGCAAT        | ChIP-qPCR          |
| Chr14 hotspot          | F : TCCTGGTAATTTTTCTTGCTTT<br>R : CCAATCCAATGTCCCTTACA        | ChIP-qPCR          |
| Chr1 coldspot          | F : TCCAGAGAAGCAGGGACA<br>R : TAACAACATAACAAAAGCCCAAA         | ChIP-qPCR          |
